# Supplementary material for: Isolation and characterization of novel mutations in the pSC101 origin that increase copy number
Source: PubMed Central journal article supplement (PMC5785507; doi:10.1038/s41598-018-20016-w), 2018-01-25
Supplement: 41598_2018_20016_MOESM1_ESM.pdf [file 41598_2018_20016_MOESM1_ESM.pdf]

## **Isolation and characterization of novel mutations in the pSC101 origin that increase copy number**

Mitchell G. Thompson<sup>1,2,3,#</sup>, Nima Sedaghatian<sup>1,2,#</sup>, Jesus F. Barajas<sup>2,4</sup>, Maren Wehrs<sup>1,2</sup>,  
Constance B. Bailey<sup>1,2</sup>, Nurgul Kaplan<sup>1,2</sup>, Nathan J. Hillson<sup>1,2,4</sup>, Aindrila Mukhopadhyay<sup>1,2</sup>, and  
Jay D. Keasling<sup>1,2,5,6,7\*</sup>

<sup>1</sup>DOE Joint BioEnergy Institute, 5885 Hollis Street, Emeryville, CA 94608, USA.

<sup>2</sup>Biological Systems & Engineering Division, Lawrence Berkeley National Laboratory, Berkeley, CA 94720, USA.

<sup>3</sup>Department of Plant and Microbial Biology, University of California, Berkeley, CA 94720, USA

<sup>4</sup>DOE Agile BioFoundry, Emeryville, CA 94608, USA

<sup>5</sup>Department of Bioengineering, University of California, Berkeley, CA 94720, USA

<sup>6</sup>Department of Chemical and Biomolecular Engineering, University of California, Berkeley, CA 94720, USA

<sup>7</sup>The Novo Nordisk Foundation Center for Biosustainability, Technical University of Denmark, Denmark, Building 220 Kemitorvet, 2800Kgs Lyngby Denmark

<sup>#</sup>These authors contributed equally to this work.

**Supplementary Information**

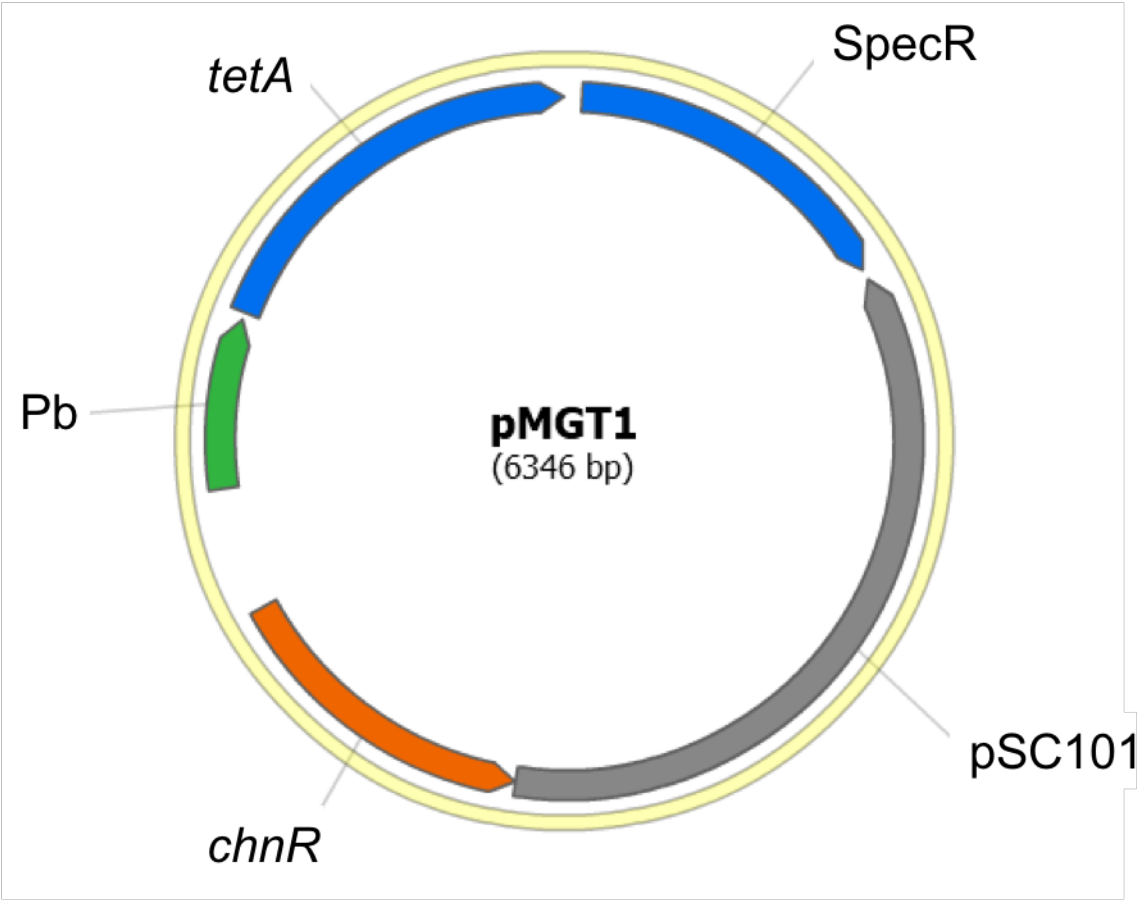

Supplementary Figure 1: Plasmid map of pMGT1. The tetracycline resistance gene *tetA* is under the control of the *chnR* responsive promoter Pb, with a pSC101 origin of replication.

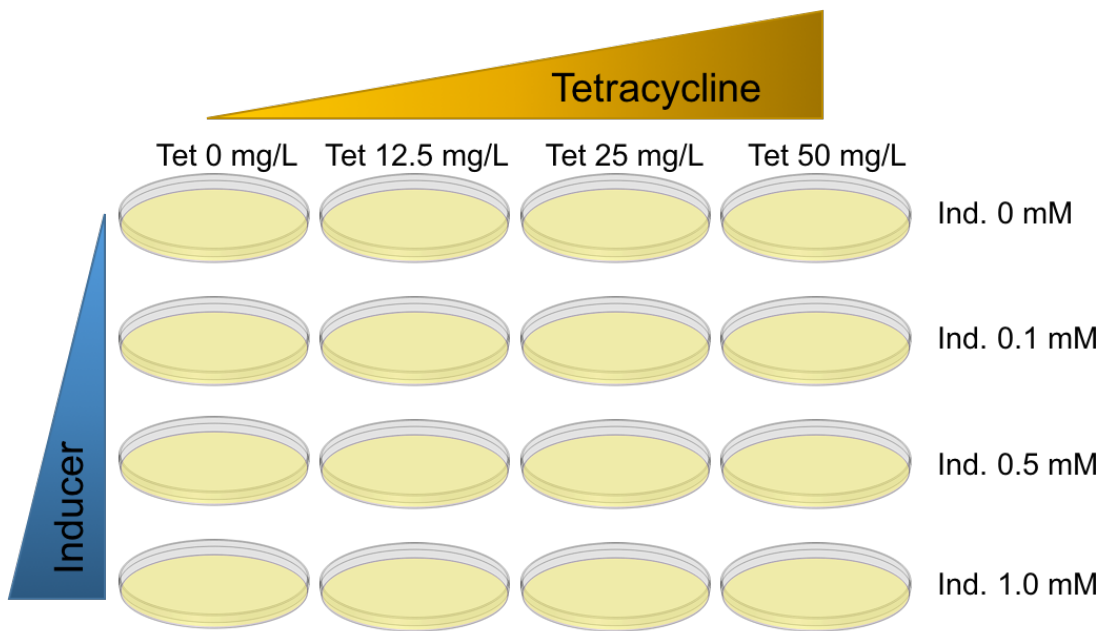

Supplementary Figure 2: Experimental design of plate-based checkerboard assay for the selection of mutants more sensitive to inducer. Mutants more sensitive to a given ligand should grow on higher concentrations of tetracycline with lower concentrations of inducer. Inducers tested were caprolactam, bromocyclohexane,  $\gamma$ -nonalactone, and  $\delta$ -undecalactone.

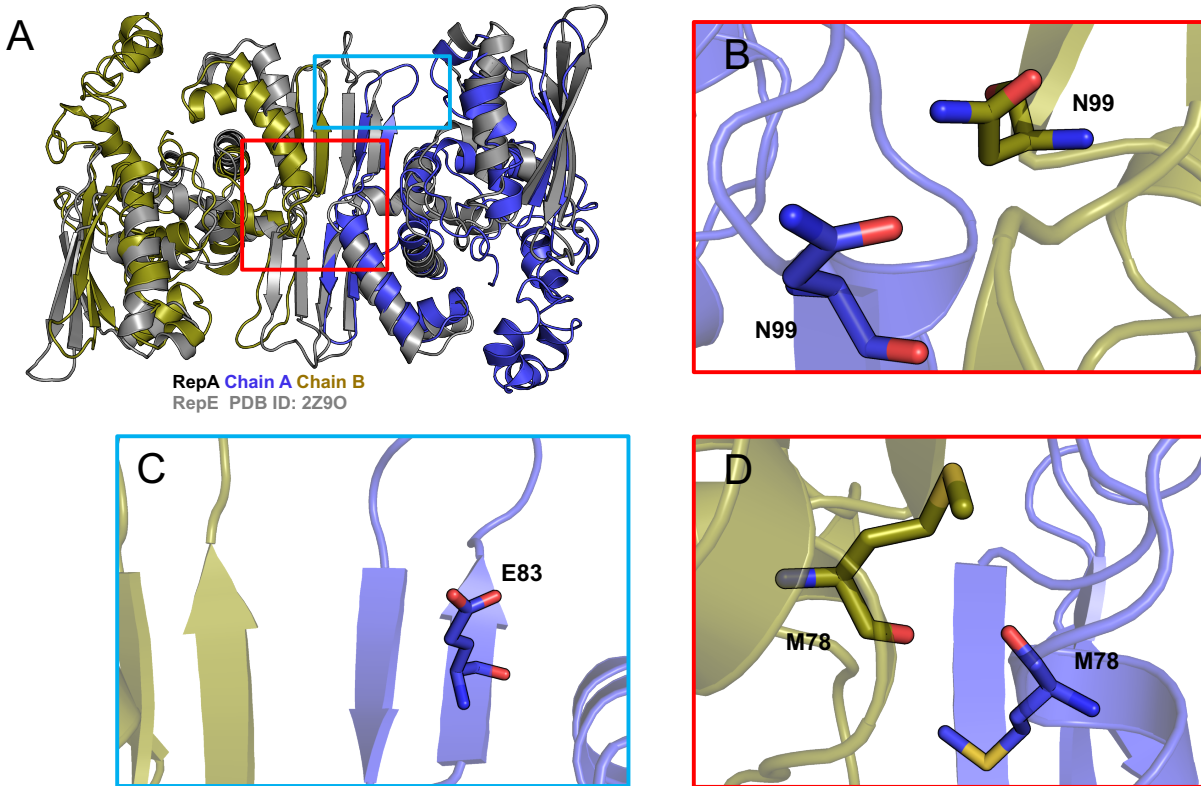

Supplementary Figure 3: A) Homology model of RepA protein based on RepE crystal structure with other commonly isolated mutations highlighted. B) Potential homointeraction of residue N99. C) Location of residue E83 within the secondary structure of the putative dimerization interface. D) Location of residue M78 within potential secondary structure of the dimerization interface.

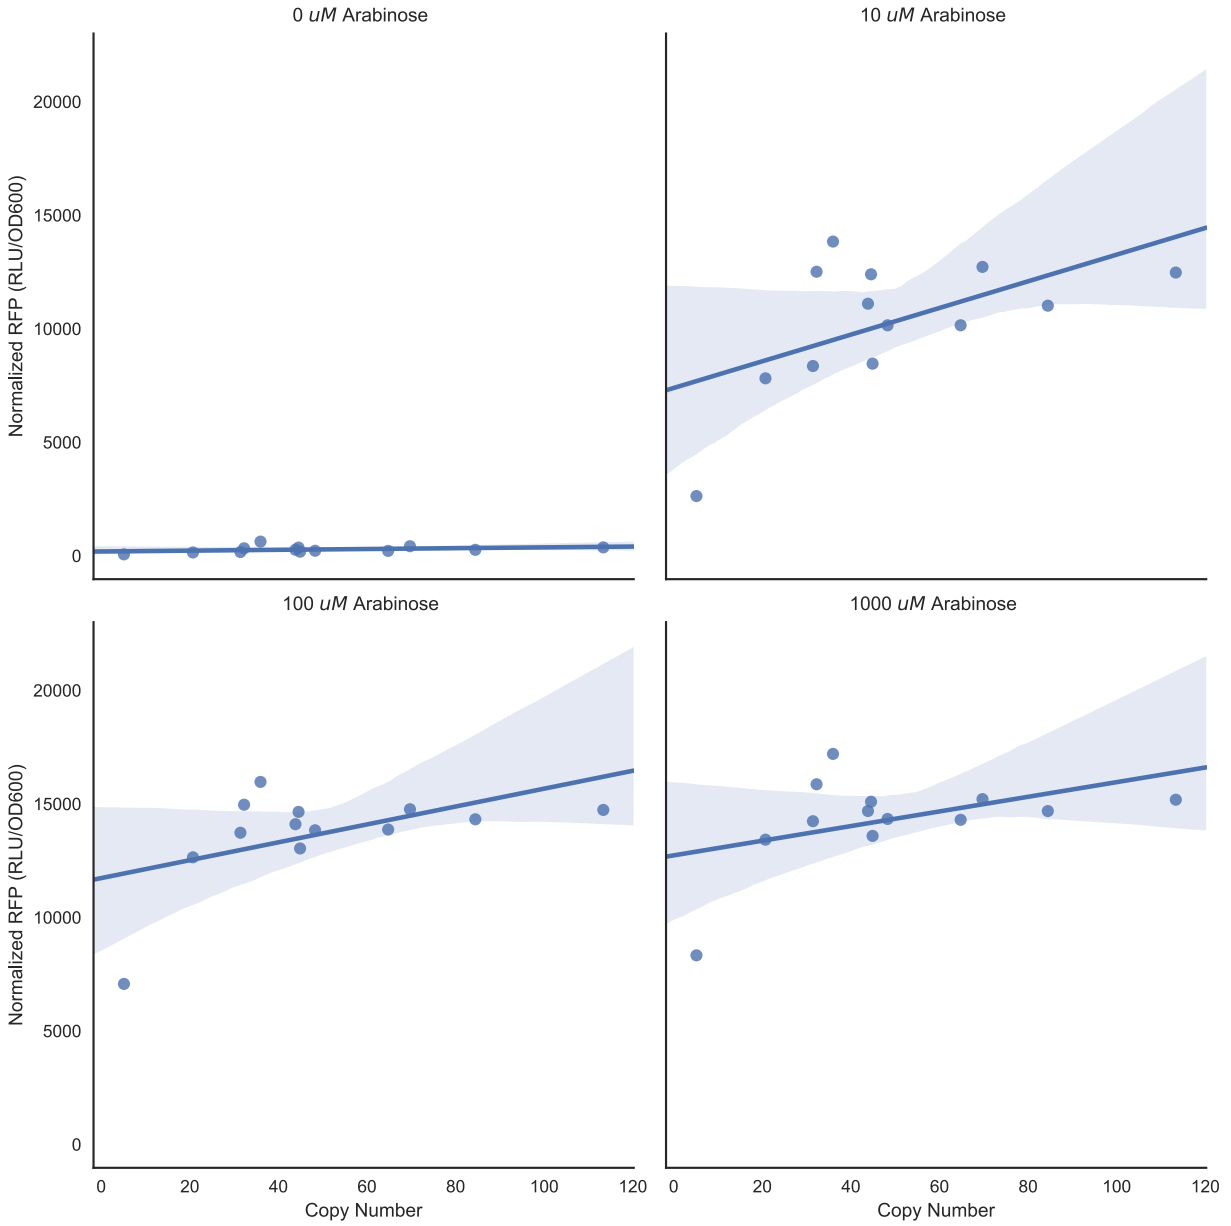

Supplementary Figure 4: Correlation of copy number to RFP fluorescence normalized to OD600 in control plasmids and single *repA* mutants. Shaded area represents 95% CI.

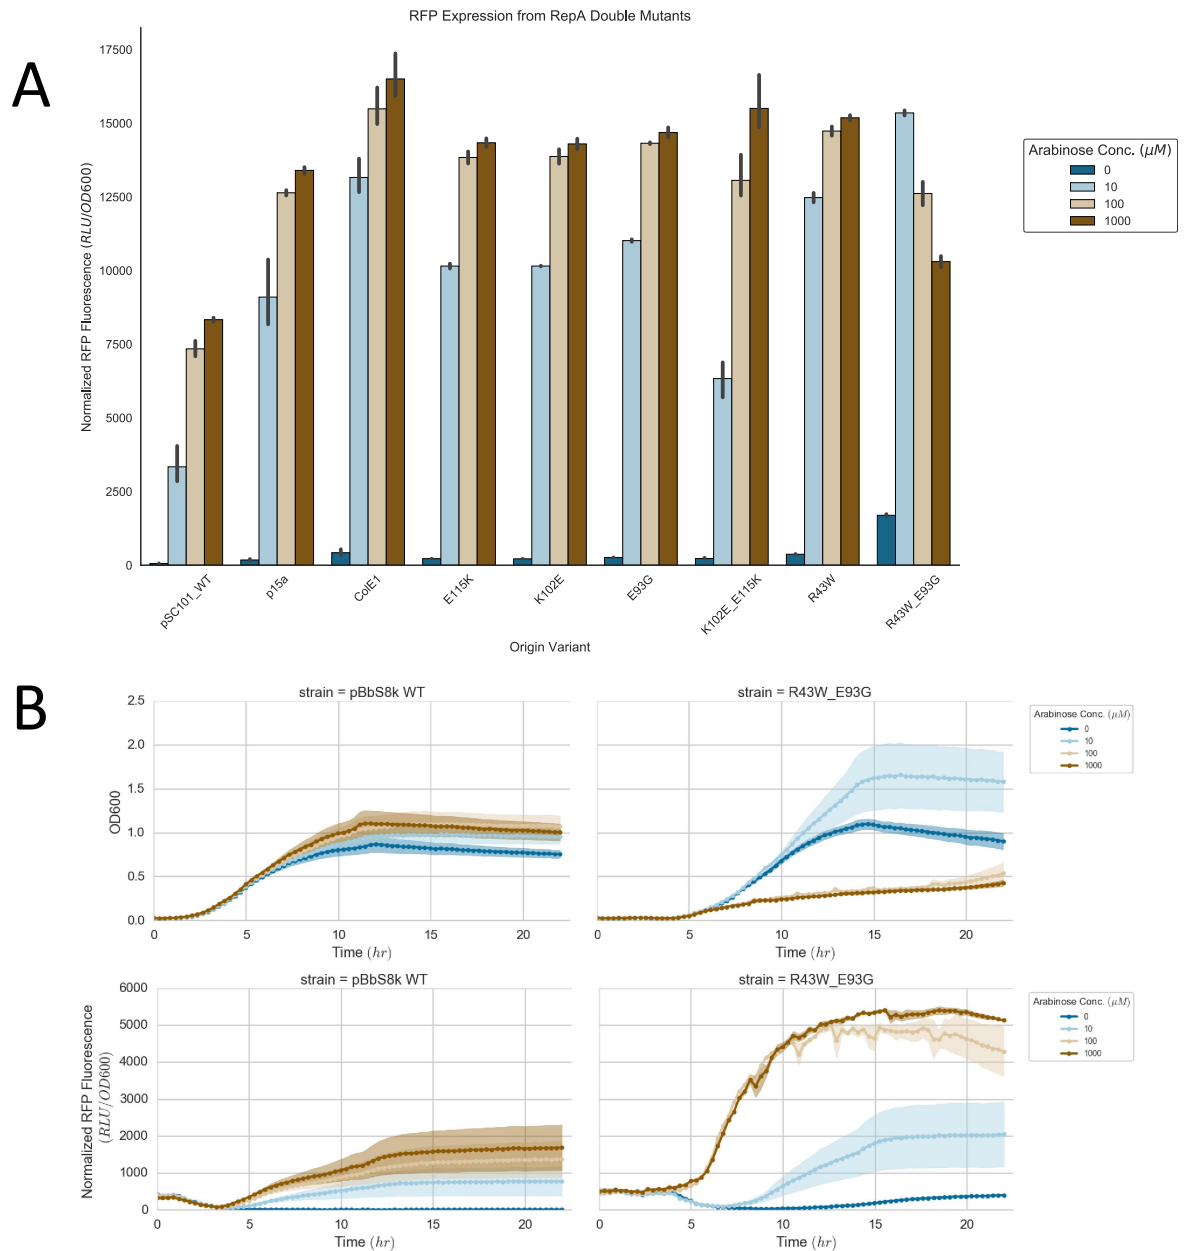

Supplementary Figure 5: A) Maximal RFP fluorescence normalized to OD600 of control plasmids, parent *repA* mutations, and double *repA* mutations predicted to be involved in electrostatic interactions between monomers. Error bars represent 95% CI (n=3). Plasmids are ordered by increasing copy number. B) Growth curves showing OD600 (Top) and RFP fluorescence normalized to OD600 (Bottom) of lowest and highest copy number plasmids identified (pSC101\_WT and R43W\_E93G, respectively).

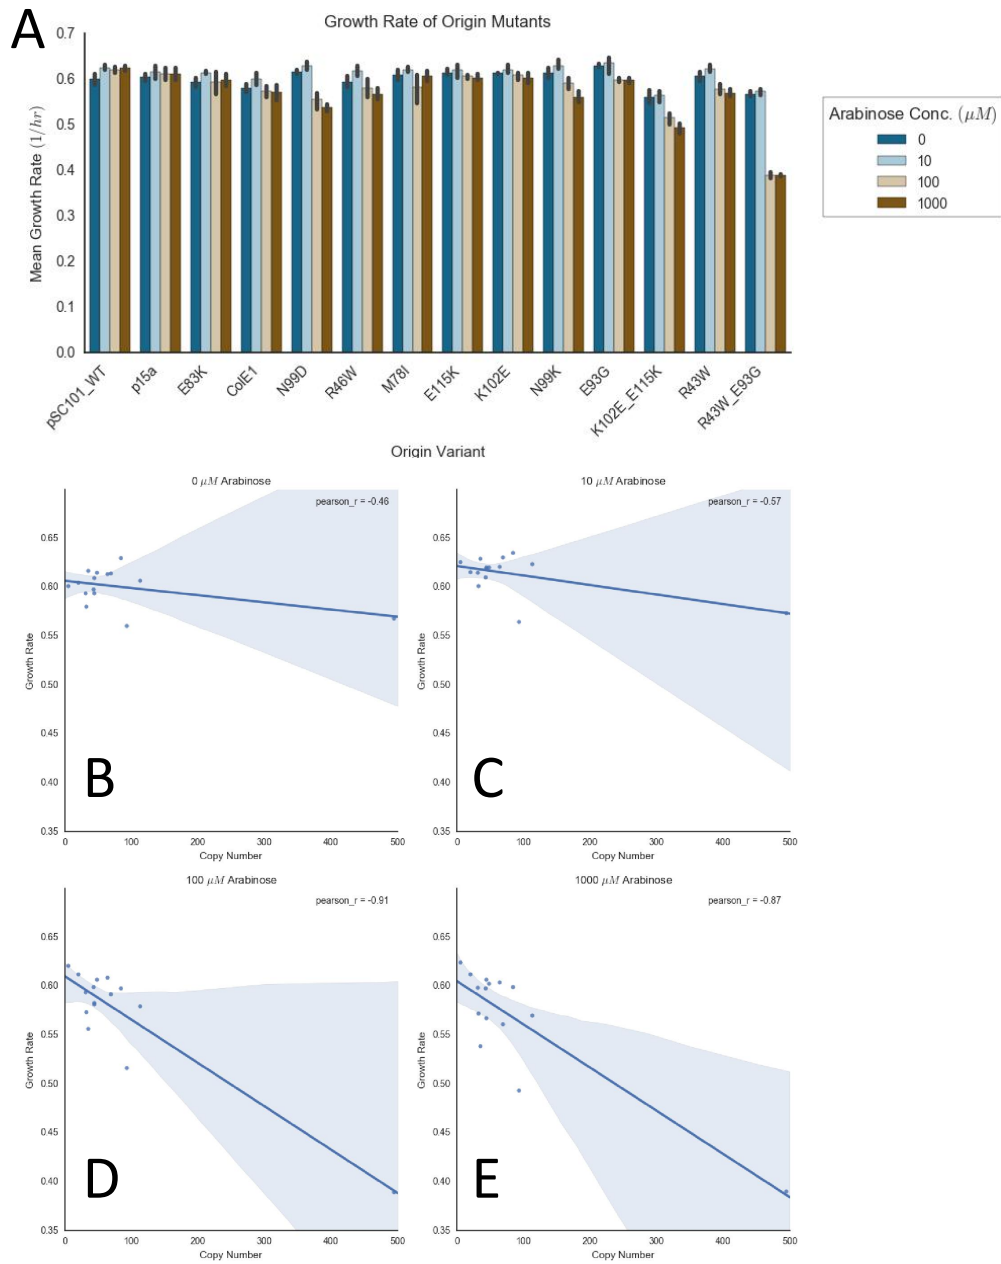

Supplementary 6: (A) Growth rate of *E. coli* DH10B carrying control plasmids and pBbs8k-RFP with RepA mutants. Error bars represent 95% CI (n=3). (B-E) Correlation of plasmid copy number and maximal growth rate of control plasmids at 0uM, 10uM, 100uM, and 1000uM arabinose. Shaded area represents 95% CI.

| Name                                  | Sequence                                | Notes                                                           |
|---------------------------------------|-----------------------------------------|-----------------------------------------------------------------|
| 317 RepA C136T R                      | aacgataaccgtccattcttc                   | pBbS8k-RFP R46W construction, used with kan F                   |
| 316 RepA C136T F                      | gaagaatggacggtatcggt                    | pBbS8k-RFP R46W construction, used with kan R                   |
| 318 RepA A295G R                      | ttccaatggacagatagcc                     | pBbS8k-RFP N99D construction, used with kan F                   |
| 319 RepA A295G F                      | ggcatagtctgtccactgaa                    | pBbS8k-RFP N99D construction, used with kan R                   |
| 325 RepA G137A F                      | ggaaagaacagacggatcgttc                  | pBbS8k-RFP R46Q construction, used with kan F                   |
| 326 RepA G137A R                      | acgataccgtctgtctcttc                    | pBbS8k-RFP R46Q construction, used with kan R                   |
| 327 RepA C297G F                      | cagtgacaaaatgatccaag                    | pBbS8k-RFP N99K construction, used with kan F                   |
| 328 RepA C297G R                      | cttggcactcttccactg                      | pBbS8k-RFP N99K construction, used with kan R                   |
| 332 RepA C278G F                      | agccttgggatttccagtg                     | pBbS8k-RFP E93G construction, used with kan F                   |
| 329 RepA C278G R                      | ccactgaaatcccaagcct                     | pBbS8k-RFP E93G construction, used with kan R                   |
| 330 RepA A304G F                      | caaatatcccaggtctcaagc                   | pBbS8k-RFP K102E construction, used with kan F                  |
| 331 RepA A304G R                      | gcttgagaactcggcatagttg                  | pBbS8k-RFP K102E construction, used with kan R                  |
| a127t_F                               | cacgattgaaaaccctacatgaaagaacggacgg      | pBbS8k-RFP R43W_E93G construction from R43W, used with kan_R    |
| a127t_R                               | ccgtccgttcttccatgagggtttcaatcgtg        | pBbS8k-RFP R43W_E93G construction from R43W, used with kan_F    |
| g234a_F                               | ttcacagtctcgttatcagctctctggtctt         | pBbS8k-RFP M78I construction, used with kan_R                   |
| g234a_R                               | aagcaaccagagagctgataacgagaactgtgaa      | pBbS8k-RFP M78I construction, used with kan_F                   |
| g247a_F                               | ccaaggattcctgatttccagttctctcag          | pBbS8k-RFP E83K construction, used with kan_R                   |
| g247a_R                               | ctgatgacgagaactgtgaaaatcaggaatccttgg    | pBbS8k-RFP E83K construction, used with kan_F                   |
| g343a_F                               | gaattagtttttagtgaagaatattgcttatctttcc   | pBbS8k-RFP K102E_E115K construction from E115K, used with kan_R |
| g343a_R                               | ggaaaagataaaggcaatcttttcaactaaaactaattc | pBbS8k-RFP K102E_E115K construction from E115K, used with kan_F |
| kan_F                                 | ctgatctctctctccagatcctctgac             | Used to construct all site-directed mutants                     |
| kan_R                                 | gaagtcccgggagatctctctgac                | Used to construct all site-directed mutants                     |
| 271 OriSeqFpSC101                     | tagtaattatcattgactagcc                  | site-directed mutant sequencing primer                          |
| j5_00063 (tetA) forward               | cgtaatgagggtaccatgaaacccaatacccctgatcgt | pDVA01657 TetA PlusSpacer construction                          |
| j5_00064 (tetA) reverse               | gcacgatcaacggttagcagatcggtctgtgcc       | pDVA01657 TetA PlusSpacer construction                          |
| j5_00061 (biosensor backbone) forward | cgctaaccgttgatctgctatgacgac             | pDVA01657 TetA PlusSpacer construction                          |
| j5_00062 (biosensor backbone) reverse | gtttcatgtaccctccattacgacatgtgaatttattc  | pDVA01657 TetA PlusSpacer construction                          |
| nphII forward                         | GCGTTGGCTACCCGTGATAT                    | qPCR of nphII                                                   |
| nphII reverse                         | AGGAAGCGGTACGCCAT                       | qPCR of nphII                                                   |
| nphII forward                         | CCGGATTGGAGTCTGCAACT                    | qPCR of 16S rDNA                                                |
| nphII reverse                         | GTGGCATTCTGATCCACGATTAC                 | qPCR of 16S rDNA                                                |

Supplementary Table 1: All primers used in this study
